# Supplementary material
Source: publisher site journal article supplement (https://www.dovepress.com/article/556657)
Supplement: Supplementary file 1 [file 556657_Supplemental%20materials.docx]

**Supplemental materials**

**Phase II trial of an orelabrutinib-based combination therapy in newly diagnosed primary central nervous system lymphoma**

Authors: Yajing Zhao, Xinguang Liu, Qiang He, Yafei Yu, Lei Xu, Caifeng Sun, Guoqiang Liu, Liang Wang, Ji Ma

**
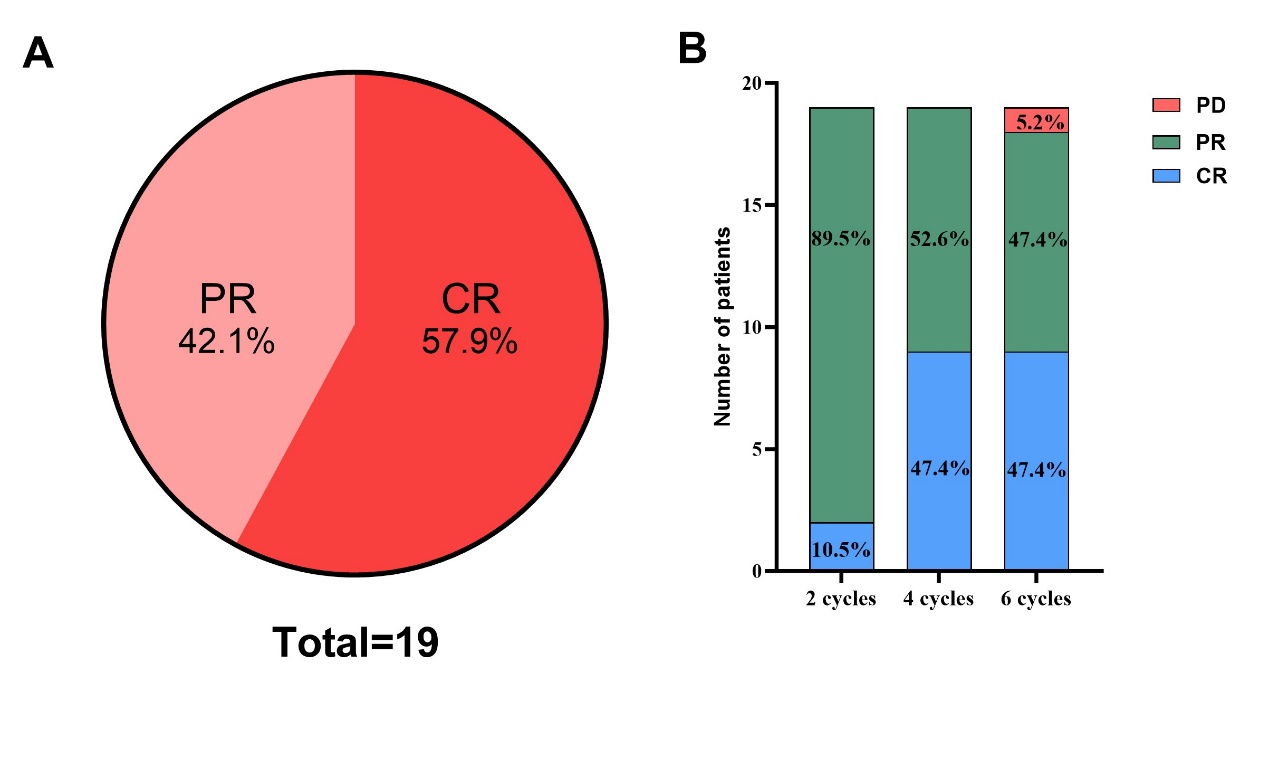
**

**Figure S1. Outcomes after induction therapy in the evaluable population**

(**A**) The best outcomes during the induction therapy. (**B**) Outcomes after 2, 4, and 6 cycles of induction therapy. PR, partial remission; CR, complete remission; PD, progressive disease.


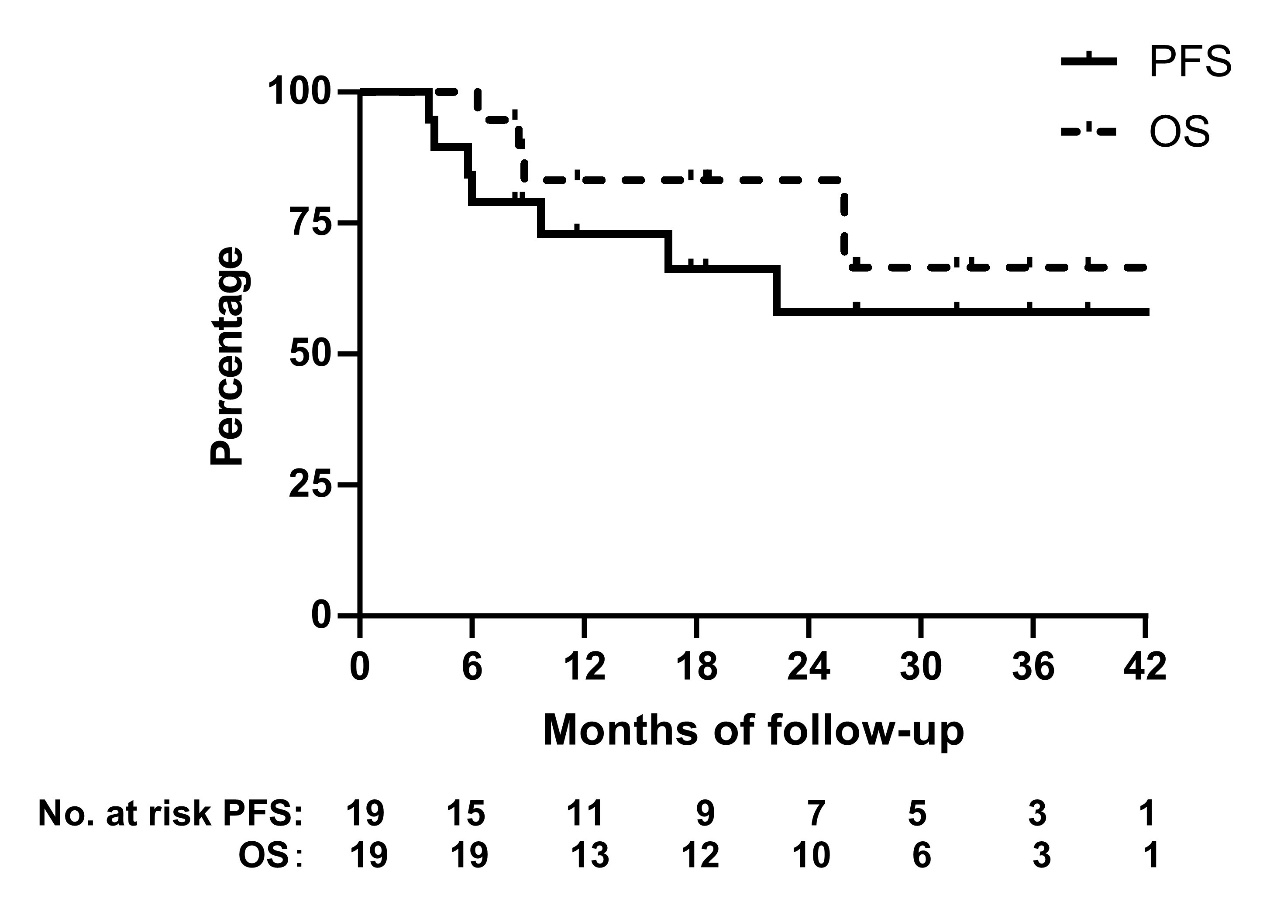


**Figure S2. Kaplan–Meier survival curves in the evaluable population**

The progression-free survival (PFS) and overall survival (OS) curves of the evaluable population.
